# Supplementary material for: The New Challenge of Sports Nutrition: Accepting Insect Food as Dietary Supplements in Professional Athletes
Source: Foods. 2021 May 18;10(5):1117. doi: 10.3390/foods10051117 (PMC8157859; doi:10.3390/foods10051117)
Supplement: Supplementary file 1 [file foods-10-01117-s001.zip › foods-1194162-supplementary.pdf]

## Supplementary Materials

Table S1. Responses (percent correct) of individual items in the use of nutritional supplements

Distribution of responses to reasons, source of information, type of supplements and perceptions about nutritional (N = 61)

---

**What is the main reason of using dietary supplements? n (%)**

|                                          |             |
|------------------------------------------|-------------|
| <i>Improve performance</i>               | 30.0 (49.2) |
| <i>Prevent deficiencies</i>              | 22.0 (36.1) |
| <i>Improve health</i>                    | 28.0 (45.9) |
| <i>Improve recovery</i>                  | 44.0 (72.1) |
| <i>Gain weight &amp; muscle</i>          | 11.0 (18.0) |
| <i>Recover from an injury or illness</i> | 7.0 (11.5)  |
| <i>Supplement diet</i>                   | 8.0 (13.1)  |

**How do you obtain information about these products? n (%)**

|                               |             |
|-------------------------------|-------------|
| <i>Coach/instructors</i>      | 24.0 (39.3) |
| <i>Friends/Teammates</i>      | 9.0 (14.8)  |
| <i>Retail store/pharmacy</i>  | 4.0 (6.6)   |
| <i>Nutritionist/dietician</i> | 40.0 (65.6) |
| <i>Physician</i>              | 21.0 (34.4) |
| <i>Magazine/online</i>        | 5.0 (8.2)   |

**Which of nutritional supplements have you used most frequently? n (%)**

|                                           |             |
|-------------------------------------------|-------------|
| <i>Multivitamins</i>                      | 39.0 (64.0) |
| <i>Fish oils: omega3,6</i>                | 24.0 (39.3) |
| <i>Minerals</i>                           | 27.0 (44.3) |
| <i>Protein-amino acid supplements</i>     | 42.0 (68.9) |
| <i>Herbals</i>                            | 5.0 (8.2)   |
| <i>Creatine</i>                           | 15.0 (24.6) |
| <i>Sport bar</i>                          | 26.0 (42.6) |
| <i>Carbohydrates supplements or sugar</i> | 20.0 (32.8) |

**What is the perceptions about supplements? n (%)**

|                                                                |             |
|----------------------------------------------------------------|-------------|
| <i>Make me healthier</i>                                       | 28.0 (45.9) |
| <i>Improve my endurance</i>                                    | 20.0 (32.8) |
| <i>Improve my speed</i>                                        | 2.0 (3.3)   |
| <i>More energy, increasing the amount of training I can do</i> | 38.0 (62.3) |
| <i>Are safe to use</i>                                         | 11.0 (18.0) |
| <i>May contain doping agents</i>                               | 2.0 (3.3)   |
| <i>Improve my concentration</i>                                | 7.0 (11.5)  |
| <i>Help me train and compete</i>                               | 26.0 (42.6) |
| <i>Increase my ability to cope with pain</i>                   | 1.0 (1.6)   |

---

Table S2. Responses (percent correct) of individual items in the A-NSKQ

| <b>General Nutrition Knowledge</b>                                                                                             | Correct % | Incorrect % | Uncertain % |
|--------------------------------------------------------------------------------------------------------------------------------|-----------|-------------|-------------|
| Protein eaten in excess of bodily needs can lead to fat gain                                                                   | 44.1      | 44.1        | 11.9        |
| Do you think these foods are high or low in carbohydrate? A Banana                                                             | 67.8      | 22.0        | 10.2        |
| Do you think these foods are high or low in carbohydrate? 1/2 cup cooked quinoa                                                | 45.8      | 47.5        | 6.8         |
| Do you think these foods are high or low in fat? 1 TBS honey                                                                   | 67.8      | 15.3        | 16.9        |
| Fat is required by the body to make cell membranes and molecules involved in immune function                                   | 42.4      | 50.8        | 6.8         |
| Do you think these foods are high or low in fat? 1/2 Cup Cottage cheese                                                        | 67.8      | 23.7        | 8.5         |
| Do you think these foods are high or low in fat? 1 TBS Polyunsaturated margarine                                               | 89.8      | 8.5         | 1.7         |
| Protein absorption in a single sitting is limited                                                                              | 72.9      | 25.4        | 1.7         |
| Do you think these foods are high or low in protein? 30g (1 ounce) Yellow Cheese                                               | 57.6      | 39.0        | 3.4         |
| Do you think these foods are high or low in protein? 1 Cup Baked Beans                                                         | 84.7      | 11.9        | 3.4         |
| Do you think these foods are high or low in protein? 1/2 Cup Cooked Quinoa                                                     | 54.2      | 40.7        | 5.1         |
| Eggs contain all the essential amino acids needed by the body                                                                  | 52.5      | 22.0        | 25.4        |
| Thiamine (Vitamin B1) is required for efficient delivery of oxygen to muscles                                                  | 8.5       | 32.2        | 59.3        |
| Vitamins provide the body with energy (kilojoules/calories)                                                                    | 55.9      | 35.6        | 8.5         |
| When consumed as part of the diet, pure alcohol (ethanol) contains calories/kilojoules and, therefore, can lead to weight gain | 78.0      | 16.9        | 5.1         |
| Drinking large amounts of alcohol can reduce recovery from injury                                                              | 78.0      | 16.9        | 5.1         |
| "Binge drinking" (also referred to as heavy episodic drinking) is generally defined as                                         | 44.1      | 52.5        | 3.4         |
| <b>Sport Nutrition Knowledge</b>                                                                                               |           |             |             |

|                                                                                                                                                                                            |      |      |      |
|--------------------------------------------------------------------------------------------------------------------------------------------------------------------------------------------|------|------|------|
| Increasing protein in the diet is the main dietary change needed when only muscle gain is desired                                                                                          | 11.9 | 86.4 | 1.7  |
| Which do you think is the best lunch option for an athlete trying to gain weight (muscle)? Assume they are training in the morning and have already had breakfast and a mid-morning snack: | 40.7 | 57.6 | 1.7  |
| When exercising at low intensities, fat provides almost all the substrate needed to cover energy costs                                                                                     | 47.5 | 39.0 | 13.6 |
| Vegetarian athletes can meet their protein requirements without the use of protein                                                                                                         | 45.8 | 45.8 | 8.5  |
| The protein needs of a 100 kg (220 lb) well trained resistance athlete are closest to:                                                                                                     | 30.5 | 45.8 | 23.7 |
| Athletes have increased magnesium needs due to losses in sweat                                                                                                                             | 10.2 | 79.7 | 10.2 |
| The optimal calcium intake for athletes aged 15 to 24 years is 500 mg                                                                                                                      | 10.2 | 22.0 | 67.8 |
| A physically fit person eating a nutritionally adequate diet can improve their performance by eating more vitamins and minerals                                                            | 39.0 | 57.6 | 3.4  |
| Vitamin C should be routinely supplemented by athletes                                                                                                                                     | 27.1 | 61.0 | 11.9 |
| Athletes should drink water during activity in order to:                                                                                                                                   | 20.3 | 71.2 | 8.5  |
| Regarding fluid intake during physical activity, current recommendations encourage athletes to:                                                                                            | 16.9 | 72.9 | 10.2 |
| Before competition, athletes should aim to consume foods that are high in:                                                                                                                 | 45.8 | 52.5 | 1.7  |
| In events last 60 - 90 minutes, 30- 60 g (1.0 - 2.0 ounces) of carbohydrates should be consumed per hour                                                                                   | 55.9 | 15.3 | 28.8 |
| Consuming carbohydrate during exercise will assist in maintaining blood glucose levels                                                                                                     | 79.7 | 3.4  | 16.9 |
| Which of the following best meets the recommendations for a snack consumed during high-intensity exercise lasting around 90 minutes?                                                       | 47.5 | 49.2 | 3.4  |
| How much protein do you think experts recommend athletes should have after completing a resistance exercise session?                                                                       | 37.3 | 40.7 | 22.0 |
| Supplement labels may contain false or misleading information                                                                                                                              | 52.5 | 30.5 | 16.9 |

|                                                                                                                                                                |      |      |      |
|----------------------------------------------------------------------------------------------------------------------------------------------------------------|------|------|------|
| The purity and safety of all supplements are tested before sale                                                                                                | 44.1 | 42.4 | 13.6 |
| In relation to improving sporting performance, which of the following supplements do you think has NOT been supported by a strong body of scientific evidence? | 5.1  | 39.0 | 55.9 |
| Which of the following supplements do you think is banned by the WORLD ANTI-DOPING AGENCY (WADA)?                                                              | 91.5 | 8.5  | 0.0  |
